# Supplementary material for: Linear polarization signatures of atmospheric dust with the SolPol direct-sun polarimeter
Source: Copernicus journal article supplement (doi:10.5194/amt-16-4529-2023), 2023-10-12
Supplement: Supplementary file 1 [file amt-16-4529-2023-supplement.zip]

Archive with 3 entries (3 files):
- amt-16-4529-2023-supplement-title-page.pdf
- SolPol_manual.pdf
- SolPol_Dark_Tests_suppl.pdf
