# Supplementary material for: Linear polarization signatures of atmospheric dust with the SolPol direct-sun polarimeter
Source: Copernicus journal article supplement (doi:10.5194/amt-16-4529-2023), 2023-10-12
Supplement: Supplementary file 1 [file amt-16-4529-2023-supplement.zip › amt-16-4529-2023-supplement-title-page.pdf]

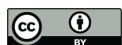

## *Supplement of*

# **Linear polarization signatures of atmospheric dust with the SolPol direct-sun polarimeter**

**Vasiliki Daskalopoulou et al.**

*Correspondence to:* Vasiliki Daskalopoulou (vdaskalop@noa.gr)

- amt-16-4529-2023-supplement-title-page.pdf
- SolPol\_Dark\_Tests\_suppl.pdf
- SolPol\_manual.pdf

The copyright of individual parts of the supplement might differ from the article licence.
